# Supplementary material for: Risk of malignancies in patients with inflammatory bowel disease who used thiopurines as compared with other indications: a territory-wide study
Source: PubMed Central journal article supplement — Ther Adv Gastroenterol. 2020 Nov 18;13:1756284820967275. doi: 10.1177/1756284820967275 (PMC7682226; doi:10.1177/1756284820967275), 2020-11-18
Supplement: sj-pdf-1-tag-10.1177_1756284820967275.pdf [file sj-pdf-1-tag-10.1177_1756284820967275.pdf]

**Supplementary Figure 1.** Flow chart of included patients

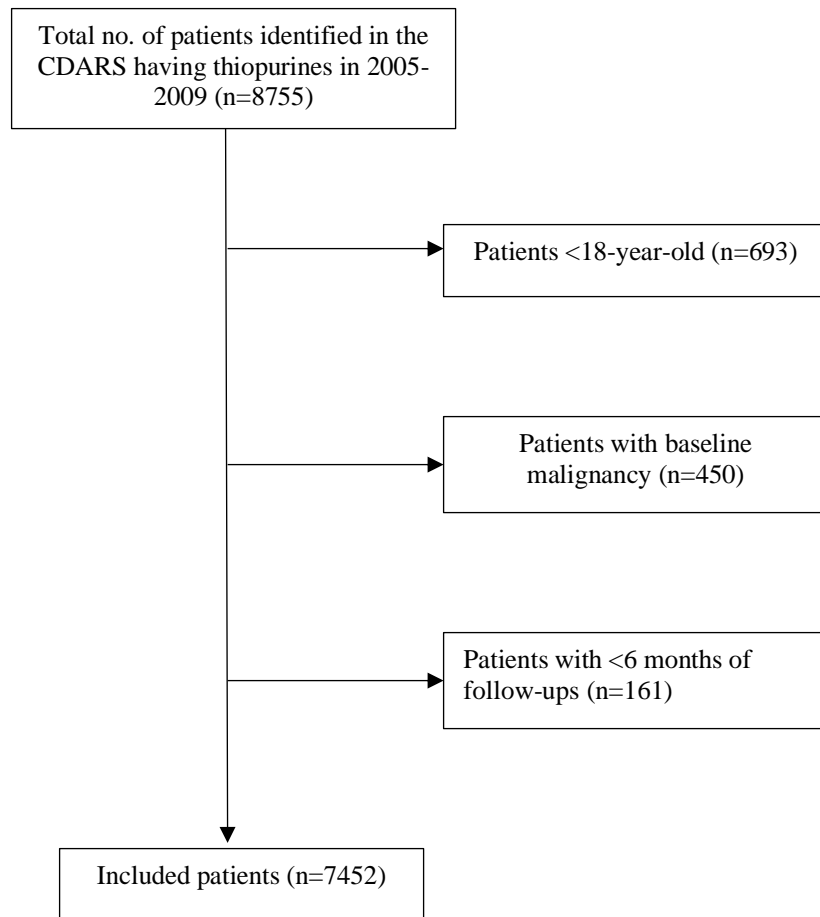

**Supplementary Table 1: ICD-9 codes for Malignant Neoplasm (140-208)**

| <b>ICD-9 Diagnostic code</b> | <b>Malignant Neoplasm of</b>                                                       |
|------------------------------|------------------------------------------------------------------------------------|
| 140                          | Lip                                                                                |
| 141                          | Tongue                                                                             |
| 142                          | Major Salivary Gland                                                               |
| 143                          | Gum                                                                                |
| 144                          | Floor of mouth                                                                     |
| 145                          | Other and unspecified parts of mouth                                               |
| 146                          | Oropharynx                                                                         |
| 147                          | Nasopharynx                                                                        |
| 148                          | Hypopharynx                                                                        |
| 149                          | Other and ill-defined site within the lip                                          |
| 150                          | Esophagus                                                                          |
| 151                          | Stomach                                                                            |
| 152                          | Small intestine, with duodenum                                                     |
| 153                          | Colon                                                                              |
| 154                          | Rectum, anus                                                                       |
| 155                          | Liver and intrahepatic bile ducts                                                  |
| 156                          | Gallbladder and extrahepatic bile ducts                                            |
| 157                          | Pancreas                                                                           |
| 158                          | Retroperitoneum and peritoneum                                                     |
| 159                          | Other and ill-defined sites within the digestive disease and peritoneum            |
| 160                          | Nasal cavities, middle ear and accessory sinuses                                   |
| 161                          | Larynx                                                                             |
| 162                          | Trachea, bronchus and lung                                                         |
| 163                          | Pleura                                                                             |
| 164                          | Thymus, heart and mediastinum                                                      |
| 165                          | Other and ill-defined sites within the respiratory system and intrathoracic organs |
| 171                          | Bone and articular cartilage                                                       |
| 172                          | Connective and other soft tissue                                                   |
| 173                          | Melanoma of skin                                                                   |
| 174                          | Female breast                                                                      |
| 175                          | Male breast                                                                        |
| 176                          | Kaposi' sarcoma                                                                    |
| 179                          | Uterus                                                                             |
| 180                          | Cervix uteri                                                                       |
| 181                          | Placenta                                                                           |
| 182                          | Body of uterus                                                                     |
| 183                          | Ovary and other uterine adnexa                                                     |
| 184                          | Other and unspecified parts of female genital organs                               |

|     |                                                                |
|-----|----------------------------------------------------------------|
| 185 | Prostate                                                       |
| 186 | Testis                                                         |
| 187 | Penis and other male genital organs                            |
| 188 | Bladder                                                        |
| 189 | Kidney and other and unspecific3d urinary organs               |
| 190 | Eye                                                            |
| 191 | Brain                                                          |
| 192 | Other and unspecified parts of nervous system                  |
| 193 | Thyroid gland                                                  |
| 194 | Other endocrine glands and related structures                  |
| 195 | Other and ill-defined sites                                    |
| 196 | Secondary and malignant neoplasm of lymph nodes                |
| 197 | Secondary malignant neoplasm respiratory and digestive systems |
| 198 | Secondary malignant neoplasm of other specified sites          |
| 199 | Malignant neoplasm without specification of site               |
| 200 | Lymphosarcoma and reticulosarcoma                              |
| 201 | Hodgkin's disease                                              |
| 202 | Other malignant neoplasms of lymphoid and histiocytic tissue   |
| 203 | Multiple myeloma and immunoproliferative neoplasms             |
| 204 | Lymphoid leukemia                                              |
| 205 | Myeloid leukemia                                               |
| 206 | Monocytic leukemia                                             |
| 207 | Other specified leukemia                                       |
| 208 | Leukemia of unspecified cell type                              |

**Supplementary Table 2: ICD-9 codes for Disease Subgroup Analysis**

| ICD 9- Diagnostic Code                                                   |                            |
|--------------------------------------------------------------------------|----------------------------|
| <b>Rheumatological diseases</b>                                          |                            |
| Rheumatoid arthritis                                                     | 714.0                      |
| Felty's syndrome                                                         | 714.1                      |
| Other rheumatoid arthritis with visceral or systemic involvement         | 714.2                      |
| Reiter disease                                                           | 99.3                       |
| Ankylosing Spondylitis                                                   | 720.0                      |
| Inflammatory Spondylopathy NOS                                           | 720.9                      |
| Other Inflammatory Spondylopathy                                         | 720.8                      |
| Psoriatic arthropathy                                                    | 696.0                      |
| Sacroiliitis NEC                                                         | 720.2                      |
| <b>Inflammatory Bowel Disease</b>                                        |                            |
| Regional enteritis                                                       | 555.0, 555.1, 555.2, 555.9 |
| Ulcerative colitis                                                       | 556.0-556.9                |
| <b>Transplantations</b>                                                  |                            |
| Organ or tissue replaced by transplant                                   | V42.0- V42.9               |
| Complications of transplanted organ                                      | 996.8                      |
| <b>Others</b>                                                            |                            |
| Giant cell arteritis <sup>†</sup>                                        | 446.5                      |
| Systemic lupus erythematosus <sup>†</sup>                                | 710.0                      |
| Systemic sclerosis                                                       | 710.1                      |
| Sjogren's syndrome/ Sicca Syndrome <sup>†</sup>                          | 710.2                      |
| Dermatomyositis <sup>†</sup>                                             | 710.3                      |
| Polymyositis <sup>†</sup>                                                | 710.4                      |
| Other specified inflammatory polyarthropathies <sup>†</sup>              | 714.8                      |
| Polymyalgia rheumatica <sup>†</sup>                                      | 725.0-725.9                |
| Autoimmune hemolytic anemia <sup>†</sup>                                 | 283.0                      |
| Sarcoidosis <sup>†</sup>                                                 | 135.0                      |
| Behçet disease <sup>†</sup>                                              | 136.1                      |
| Idiopathic thrombocytopenia purpura <sup>†</sup>                         | 287.3                      |
| Multiple sclerosis <sup>†</sup>                                          | 340.0                      |
| Myasthenia gravis <sup>†</sup>                                           | 358.0                      |
| Polyarteritis nodosa <sup>†</sup>                                        | 446.0                      |
| Goodpasture syndrome <sup>†</sup>                                        | 446.2                      |
| Wegener granulomatosis/<br>Granulomatosis with polyangiitis <sup>†</sup> | 446.4                      |
| Autoimmune hepatitis (Chronic active hepatitis) <sup>†</sup>             | 571.4                      |
| (Discoid) lupus erythematosus <sup>†</sup>                               | 695.4                      |
| Relapsing polychondritis <sup>†</sup>                                    | 733.9                      |
| Uveitis <sup>†</sup>                                                     | 364.0-364.3                |
| Glomerulonephritis <sup>†</sup>                                          | 580.0-583.9                |
| Acquired hemolytic anemia NOS                                            | 283.9                      |
| Acquired hypothyroid NEC                                                 | 244.8                      |

|                                                   |       |
|---------------------------------------------------|-------|
| Anemia NEC                                        | 285.8 |
| Arteritis NOS <sup>†</sup>                        | 447.6 |
| Autoimmune diseases NEC <sup>†</sup>              | 279.4 |
| Biliary Cirrhosis <sup>†</sup>                    | 571.6 |
| Cholangitis                                       | 576.1 |
| Chronic Liver Diseases/ cirrhosis                 | 571.0 |
| Chronic lymphocytic thyroiditis <sup>†</sup>      | 245.2 |
| Chronic liver disease NEC                         | 571.8 |
| Chronic liver disease NOS                         | 571.9 |
| Circumscribe Scleroderma <sup>†</sup>             | 701.0 |
| Cirrhosis of liver NOS                            | 571.5 |
| Diff connective tissue disease NEC <sup>†</sup>   | 710.8 |
| Diff Connective tissue disease NOS <sup>†</sup>   | 710.9 |
| Disease of Biliary tract NEC                      | 576.8 |
| Disease of biliary tract NOS                      | 576.9 |
| Disorders of thyroid NEC                          | 246.8 |
| Endocrine disorder NEC                            | 259.9 |
| Endocrine/ Nervous Neoplasm NOS                   | 239.7 |
| Hemolytic hemoglobinuria                          | 283.2 |
| Hepatitis NOS                                     | 573.3 |
| Hereditary hemolytic anemia                       | 282.9 |
| History of endocrine/ metabolism/ immune disorder | V12.2 |
| Immune mechanism disease NOS <sup>†</sup>         | 279.9 |
| Impaired Renal Function NOS                       | 588.9 |
| Inflammatory arthropathy NOS <sup>†</sup>         | 714.9 |
| Juvenile chronic polyarthritis <sup>†</sup>       | 714.3 |
| Liver Disorder NOS                                | 573.9 |
| Liver Disorder NEC                                | 573.8 |
| Lung Disease NEC                                  | 518.8 |
| Myalgia and myositis NOS <sup>†</sup>             | 729.1 |
| Myopathy in endocrine Disorder                    | 359.5 |
| Myopathy NEC <sup>†</sup>                         | 359.8 |
| Myopathy NOS <sup>†</sup>                         | 359.9 |
| Other Liver Disorders                             | 573.0 |
| Pancreatic Disease NEC                            | 577.8 |
| Polyarthritis NOS <sup>†</sup>                    | 716.5 |
| Raynaud's syndrome <sup>†</sup>                   | 443   |

|                                                  |              |
|--------------------------------------------------|--------------|
| Respiratory System Disease NOS                   | 519.8        |
| Rheumatism NOS                                   | 729.0        |
| Takayasu's disease†                              | 446.7        |
| Pemphigus vulgaris†                              | 694.4        |
| Psoriasis†                                       | 696.1        |
| Allergic purpura †                               | 287          |
| Benign mucous membrane pemphigoid†               | 694.6        |
| Bullous dermatoses NOS†                          | 694.9        |
| Dermatitis NOS†                                  | 692.9        |
| Drug dermatitis NOS                              | 693.0        |
| Other atopic dermatitis†                         | 691.8        |
| Other dermatitis                                 | 692.8        |
| Pemphigoid†                                      | 694.5        |
| Panniculitis NOS†                                | 729.3        |
| Idiopathic Urticaria†                            | 708.1        |
| Non-specific skin eruption NEC                   | 782.1        |
| Unspecified allergic alveolitis and pneumonitis† | 495.9        |
| Alveolar pneumopathy NOS†                        | 516.9        |
| Post-inflammatory Pulmonary Fibrosis             | 515.0        |
| Idiopathic pulmonary fibrosis†                   | 516.3        |
| Autonomic neuropathy in other diseases           | 337.1        |
| Facial nerve disease NEC                         | 351.8        |
| Idiopathic peripheral neuropathy NEC†            | 356.8        |
| Idiopathic peripheral neuropathy NOS†            | 356.9        |
| Idiopathic progressive polyneuropathy†           | 356.4        |
| Inflammatory/ Toxic Neuropathy NEC               | 357.8        |
| Mononeuritis Leg NOS                             | 355.8        |
| Mononeuritis Multiplex†                          | 354.5        |
| Mononeuritis NOS                                 | 355.9        |
| Neuralgia/ Neuritis NOS                          | 729.2        |
| Neuromyelitis Optica†                            | 341.0        |
| Neuropathy in Other disease                      | 357.4        |
| Optic atrophy                                    | 377.1        |
| Other optic Nerve Disorder                       | 377.4        |
| Aplastic anemia NOS, NEC                         | 284.8, 284.9 |
| Blood diseases NOS                               | 289.9        |
| Thrombocytopenia NOS                             | 287.5        |

Abbreviation: NOS, Not otherwise specified, NEC, Not elsewhere classifiable

† other autoimmune diseases

**Supplementary Table 3: Concomitant immunosuppressant uses in different disease groups**

|                                 | <b>IBD</b> | <b>Rheumatological Disease</b> | <b>Transplantation</b> | <b>Others</b> |
|---------------------------------|------------|--------------------------------|------------------------|---------------|
| <b>Biologics</b>                |            |                                |                        |               |
| Anti-TNFs                       | 115        | 56                             | 0                      | 9             |
| <b>Other immunosuppressants</b> |            |                                |                        |               |
| Tacrolimus                      | 20         | 15                             | 445                    | 345           |
| Ciclosporin                     | 22         | 110                            | 1292                   | 895           |
| Methotrexate                    | 58         | 229                            | 14                     | 326           |
| Mycophenolate                   | 10         | 33                             | 647                    | 1148          |

Abbreviations: IBD, Inflammatory Bowel Disease; TNF, Tumor Necrosis Factor.

**Supplementary Table 4. SIR for the all site malignancy in thiopurine users with Crohn's disease or ulcerative colitis**

|                                           | Crohn's disease<br>(n = 363) |                 |                   | Ulcerative colitis<br>(n=232) |                 |                  |
|-------------------------------------------|------------------------------|-----------------|-------------------|-------------------------------|-----------------|------------------|
|                                           | Observed<br>No.              | Expected<br>No. | SIR (95%CI)       | Observed<br>No.               | Expected<br>No. | SIR (95%CI)      |
| All Site                                  | 19                           | 7.66            | 2.48 (1.53-3.77)  | 21                            | 9.24            | 2.27 (1.43-3.39) |
| Lip, oral cavity and pharynx              | 1                            | 0.19            | 5.24 (0.3-23.0)   | 1                             | 0.22            | 4.55 (0.26-20.0) |
| Digestive organs                          | 9                            | 2.20            | 4.09 (1.97-7.38)  | 6                             | 3.08            | 1.95 (0.77-3.95) |
| Esophagus                                 | 1                            | 0.11            | 9.39 (1.32-66.7)  | 0                             | 0.16            | N/A              |
| Colorectum                                | 7                            | 1.06            | 6.58 (2.83-12.7)  | 4                             | 1.51            | 2.66 (0.82-6.17) |
| Liver                                     | 1                            | 0.56            | 1.80 (0.10-7.91)  | 1                             | 0.72            | 1.39 (0.08-6.11) |
| Gallbladder and<br>extrahepatic bile duct | 0                            | 0.06            | N/A               | 1                             | 0.11            | 9.47 (1.33-67.3) |
| Larynx                                    | 1                            | 0.049           | 20.3 (2.87-144.4) | 0                             | 0.074           | N/A              |
| Trachea, bronchus and lung                | 0                            | 1.00            | N/A               | 2                             | 1.50            | 1.34 (0.33-5.34) |
| Non-melanoma skin                         | 0                            | 0.20            | N/A               | 1                             | 0.27            | 3.65 (0.51-25.9) |
| Breast                                    | 0                            | 1.01            | N/A               | 2                             | 0.98            | 2.04 (0.51-8.16) |
| Ovary etc.                                | 1                            | 0.18            | 5.71 (0.33-25.1)  | 2                             | 0.15            | 12.9 (2.15-39.9) |
| Prostate                                  | 0                            | 0.31            | N/A               | 2                             | 0.52            | 3.83 (0.96-15.3) |
| Kidney and other urinary<br>organs        | 2                            | 0.25            | 8.04 (1.34-24.8)  | 1                             | 0.34            | 2.95 (0.17-13.0) |
| Lymphoid and<br>hematopoietic tissue      | 4                            | 0.53            | 7.58 (2.35-17.6)  | 3                             | 0.54            | 5.54 (1.38-14.4) |
| Leukemia                                  | 2                            | 0.18            | 11.3 (1.88-34.9)  | 2                             | 0.16            | 12.4 (2.07-38.4) |
| Non-Hodgkin lymphoma                      | 2                            | 0.26            | 7.61 (1.26-23.5)  | 1                             | 0.29            | 3.50 (0.20-15.4) |

Abbreviations: CI, Confidence Interval; SIR, Standardized Incidence Ratio



**Supplementary Table 5. Sensitivity analysis to calculating SIRs for autoimmune diseases and other non-specific diseases**

|                                        | <b>Others<br/>(n = 4,915)</b> | <b>Other Autoimmune Diseases<br/>(n=4305)</b> |
|----------------------------------------|-------------------------------|-----------------------------------------------|
| All sites                              | 1.95 (1.76-2.15)              | 2.01 (1.80-2.23)                              |
| Lip, oral cavity and pharynx           | 3.49 (1.92-5.75)              | 4.11 (2.38-7.07)                              |
| Nasopharynx                            | 2.29 (1.33-3.94)              | 2.69 (1.56-4.63)                              |
| Digestive organs                       | 1.62 (1.31-1.97)              | 1.66 (1.33-2.05)                              |
| Esophagus                              | 2.5 (0.99-5.06)               | 2.48 (0.89-5.34)                              |
| Stomach                                | 0.41 (0.13-1.28)              | 0.48 (0.16-1.50)                              |
| Small intestine                        | 1.58 (0.22-11.19)             | 1.85 (0.26-13.14)                             |
| Colorectum                             | 1.67 (1.26-2.18)              | 1.85 (1.38-2.43)                              |
| Liver                                  | 2.19 (1.41-3.22)              | 1.70 (0.98-2.72)                              |
| Gallbladder and extrahepatic bile duct | 0.42 (0.06-2.95)              | 0.49 (0.07-3.48)                              |
| Pancreas                               | 1.05 (0.39-2.8)               | 1.24 (0.46-3.30)                              |
| Nasal cavity                           | N/A                           | N/A                                           |
| Larynx                                 | 3.10 (1.00-9.63)              | 3.71 (1.20-11.49)                             |
| Trachea, bronchus and lung             | 1.39 (1.00-1.87)              | 1.31 (0.91-1.82)                              |
| Bone and soft tissue                   | 1.77 (0.57-5.5)               | 2.05 (0.66-6.34)                              |
| Bone and cartilage                     | 8.00 (2.00-32.0)              | 9.21 (2.30-36.82)                             |
| Melanoma of skin                       | 5.86 (1.89-18.2)              | 6.81 (2.20-21.13)                             |
| Non-melanoma skin                      | 1.56 (0.75-2.8)               | 1.42 (0.61-2.75)                              |
| Breast                                 | 1.00 (0.7-1.36)               | 1.04 (0.72-1.43)                              |
| Vagina, vulva and other female organs  | 1.65 (0.23-11.7)              | 1.91 (0.27-13.53)                             |
| Cervix uteri                           | 2.08 (1.12-3.86)              | 2.34 (1.26-4.36)                              |
| Corpus uteri                           | 1.59 (0.94-2.69)              | 1.55 (0.88-2.73)                              |
| Ovary                                  | 0.53 (0.13-1.36)              | 0.40 (0.07-1.22)                              |
| Prostate                               | 1.48 (0.77-2.53)              | 1.28 (0.58-2.38)                              |
| Urinary organs                         | 3.56 (2.25-5.31)              | 4.21 (2.75-6.46)                              |
| Kidney and other urinary organs        | 2.82 (1.52-5.24)              | 3.33 (1.79-6.18)                              |
| Bladder                                | 4.67 (2.58-8.42)              | 5.53 (3.06-9.99)                              |
| Brain and nervous system               | 1.44 (0.36-5.78)              | 1.67 (0.42-6.69)                              |
| Thyroid gland                          | 2.31 (1.42-3.78)              | 2.45 (1.47-4.06)                              |
| Lymphoid and hematopoietic tissue      | 5.81 (4.48-7.38)              | 6.23 (4.75-8.00)                              |
| Multiple myeloma                       | 3.38 (1.41-8.12)              | 3.19 (1.20-8.49)                              |
| Leukemia                               | 3.82 (2.04-6.40)              | 4.06 (2.11-6.96)                              |
| Hodgkin lymphoma                       | 2.23 (0.31-15.8)              | 2.54 (0.36-18.03)                             |
| Non-Hodgkin lymphoma                   | 7.88 (5.78-10.5)              | 8.58 (6.21-11.48)                             |

Abbreviations: CI, Confidence Interval; SIR, Standardized Incidence Ratio
